# Supplementary material for: Simultaneous multiplexed quantification of caffeine and its major metabolites theobromine and paraxanthine using surface-enhanced Raman scattering
Source: PubMed Central journal article supplement (PMC4604501; doi:10.1007/s00216-015-9004-8), 2015-09-07
Supplement: 216_2015_9004_MOESM1_ESM.pdf [file 216_2015_9004_MOESM1_ESM.pdf]

**Analytical and Bioanalytical Chemistry**

**Electronic Supplementary Material**

**Simultaneous multiplexed quantification of caffeine and its major metabolites theobromine and paraxanthine using surface-enhanced Raman scattering**

Omar Alharbi, Yun Xu, Royston Goodacre

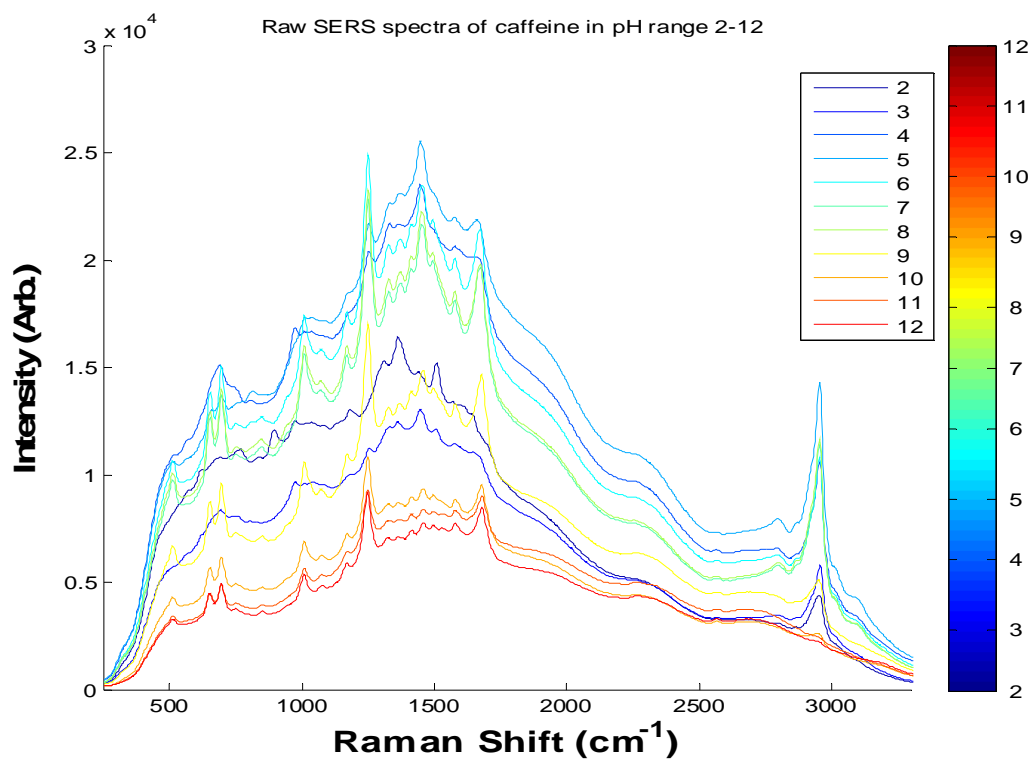

Fig. S1 Raw SERS spectra of caffeine in pH range 2-12

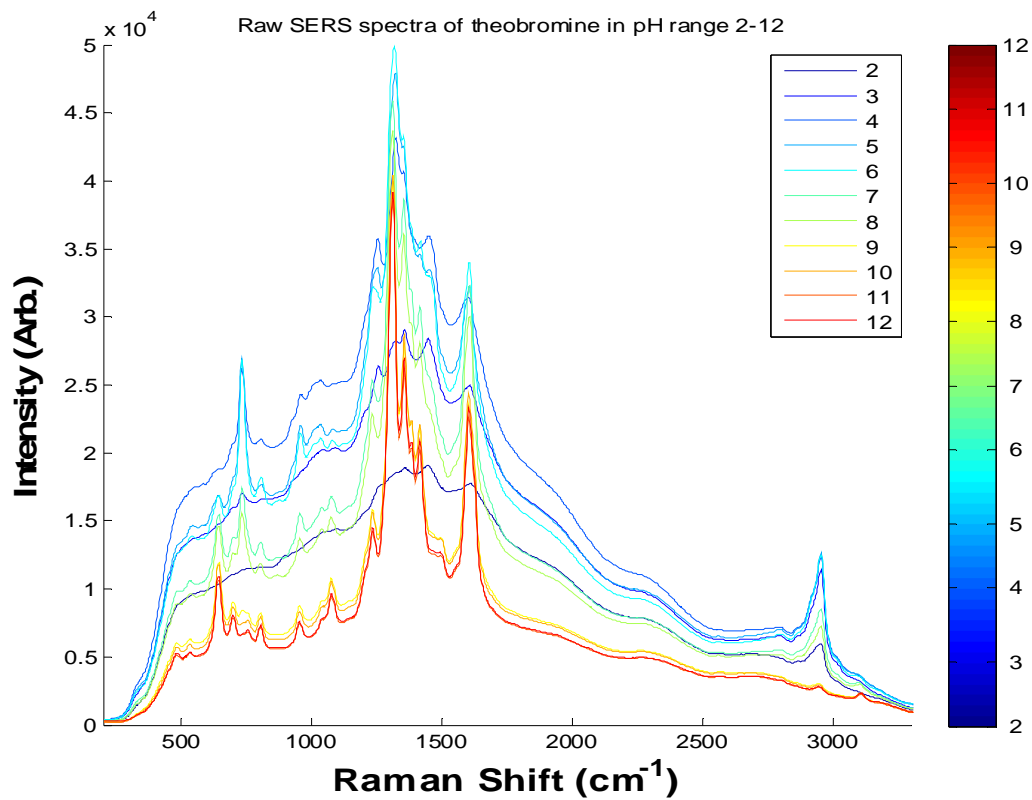

Fig. S2 Raw SERS spectra of theobromine in pH rang 2-12

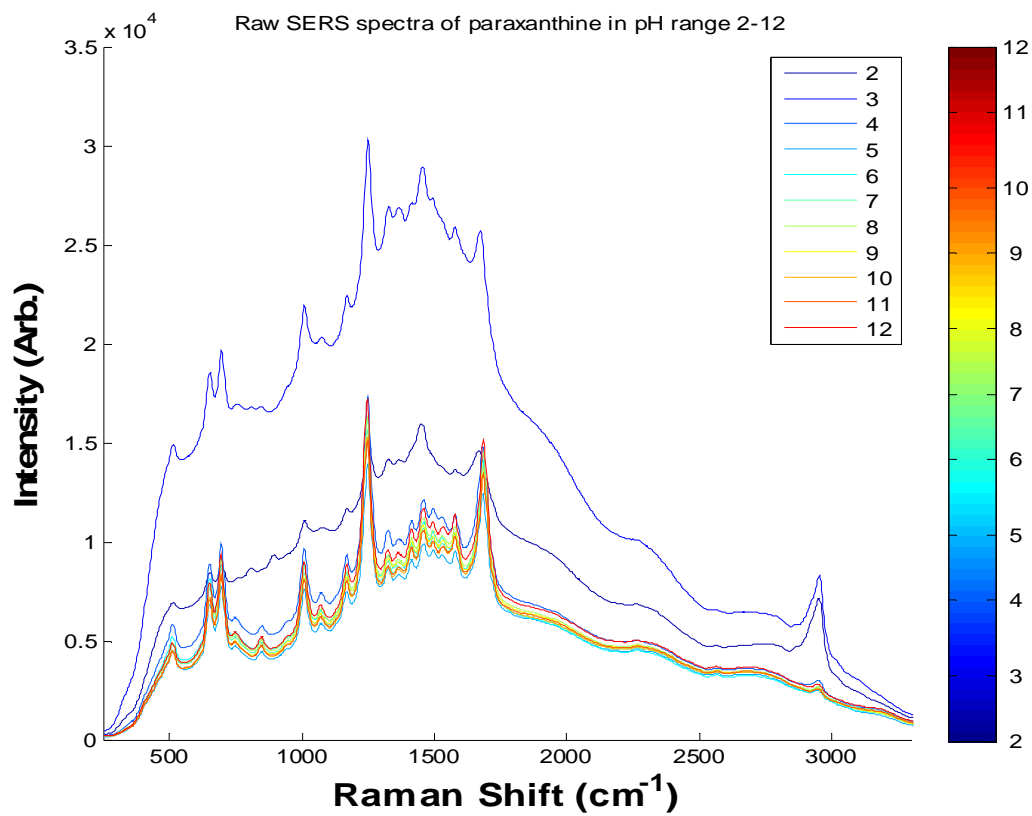

**Fig. S3** Raw SERS spectra of paraxanthine in pH range 2-12

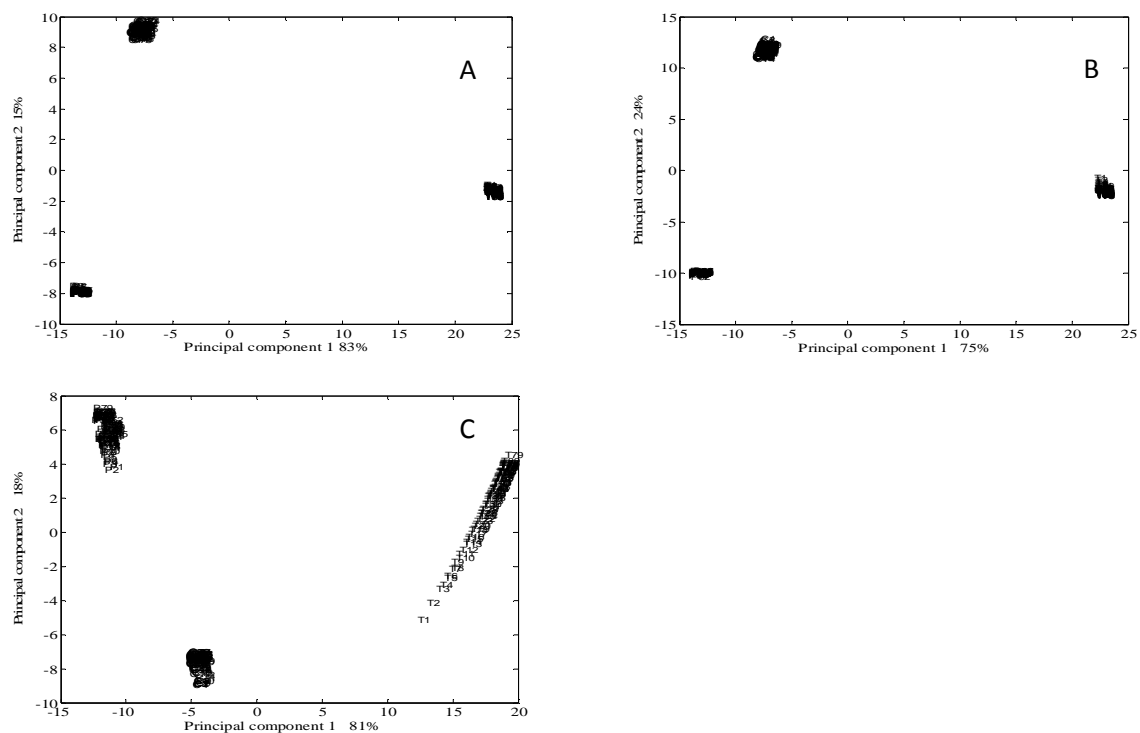

**Fig. S4** PCA scores plots of PC1 *versus* PC2 for Batches 1 (A), 2 (B) and 3 (C) of silver citrate colloid. The symbols used refer to X<sub>n</sub>, where X is either C (caffeine), (P) paraxanthine or T (theobromine) and the n refers to the order in which the spectral data have been collected. The percentage total explained variance for each of the PCs is also shown in the axes legends

For Figures S5-S7 limits of detection (LoD) were calculated using procedures detailed in Mabbott, S., Alharbi, O., Groves, K. & Goodacre, R. (2015) Application of surface enhanced Raman scattering to the solution based detection of a popular legal high, 5,6-methylenedioxy-2-aminoindane (MDAI). *Analyst* 140, 4399-4406.

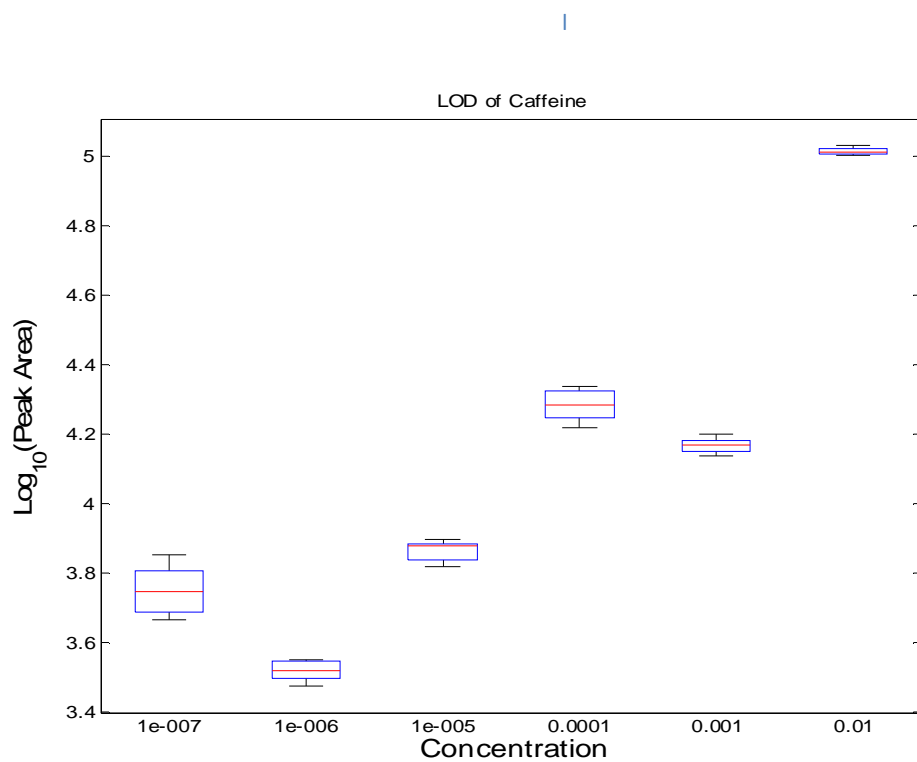

**Fig. S5** Plot of Peak area for  $693\text{ cm}^{-1}$  against [caffeine]; this was used to establish the limit of detection and the practical useful linear concentration range

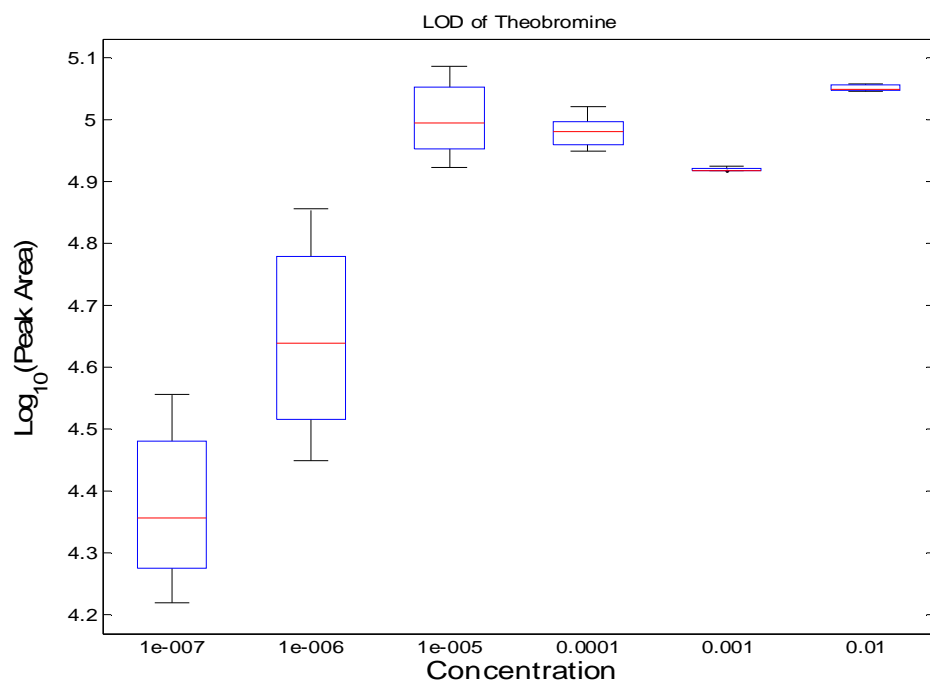

**Fig. S6** Plot of Peak area for  $1303\text{ cm}^{-1}$  against [theobromine]; this was used to establish the limit of detection and the practical useful linear concentration range

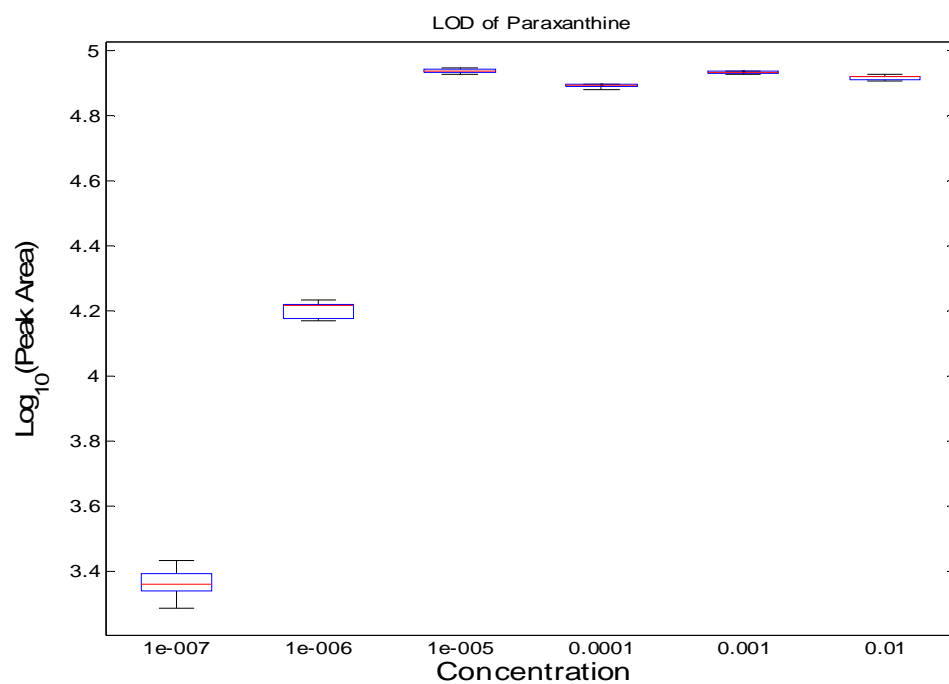

**Fig. S7** Plot of Peak area for  $693\text{ cm}^{-1}$  against [paraxanthine]; this was used to establish the limit of detection and the practical useful linear concentration range

**Table S1** Examples of some of the tertiary mixtures and how they were generated from 3 stock solutions of caffeine, theobromine and paraxathine. For these experiments the total molarity in each tube was constant at  $1.10^{-5}$  mol/m<sup>3</sup> (10 μmol/L)

| Caff (%) | Theo (%) | Para (%) | Caff (μL) | Theo (μL) | Para (μL) | Sample number |          |          |
|----------|----------|----------|-----------|-----------|-----------|---------------|----------|----------|
| 0        | 0        | 100      | 0         | 0         | 200       | 1             | 2        | 3        |
| 0        | 10       | 90       | 0         | 20        | 180       | 4             | 5        | 6        |
| 0        | 20       | 80       | 0         | 40        | 160       | 7             | 8        | 9        |
| 0        | 30       | 70       | 0         | 60        | 140       | 10            | 11       | 12       |
| 0        | 40       | 60       | 0         | 80        | 120       | 13            | 14       | 15       |
| 0        | 50       | 50       | 0         | 100       | 100       | 16            | 17       | 18       |
| 0        | 60       | 40       | 0         | 120       | 80        | 19            | 20       | 21       |
| 0        | 70       | 30       | 0         | 140       | 60        | 22            | 23       | 24       |
| 0        | 80       | 20       | 0         | 160       | 40        | 25            | 26       | 27       |
| 0        | 90       | 10       | 0         | 180       | 20        | 28            | 29       | 30       |
| 0        | 100      | 0        | 0         | 200       | 0         | 31            | 32       | 33       |
| 10       | 0        | 90       | 20        | 0         | 180       | 34            | 35       | 36       |
| 10       | 10       | 80       | 20        | 20        | 160       | 37            | 38       | 39       |
| 10       | 20       | 70       | 20        | 40        | 140       | 40            | 41       | 42       |
| ...      | ...      | ...      | ...       | ...       | ...       | <i>n</i>      | <i>n</i> | <i>n</i> |
| 90       | 10       | 0        | 180       | 20        | 0         | 193           | 194      | 195      |
| 100      | 0        | 0        | 200       | 0         | 0         | 196           | 197      | 198      |
